# Supplementary material for: Seasonal Influence on Rumen Microbiota, Rumen Fermentation, and Enteric Methane Emissions of Holstein and Jersey Steers under the Same Total Mixed Ration
Source: MDPI journal article supplement (doi:10.3390/ani11041184), 2021-04-20
Supplement: s1 [file s1]

**Table S2.** Major bacterial phyla identified in the rumen of the Holstein and the Jersey steers at different seasons.

| Bacterial Phyla               | Breed | Season             |                    |                    |         | SEM   | Mixed <i>p</i> value |       |
|-------------------------------|-------|--------------------|--------------------|--------------------|---------|-------|----------------------|-------|
|                               |       | Winter             | Spring             | Summer             | Overall |       | Season               | Breed |
| Bacteroidetes                 | Hol   | 57.91              | 68.89              | 58.98              | 61.93   | 2.994 | <0.01                | 0.49  |
|                               | Jer   | 50.96              | 70.08              | 67.31              | 62.78   | 2.416 |                      |       |
|                               | Total | 54.43 <sup>b</sup> | 69.48 <sup>a</sup> | 63.15 <sup>a</sup> | -       | 2.705 |                      |       |
| Firmicutes                    | Hol   | 35.81              | 17.84              | 28.45              | 27.37   | 2.650 | <0.01                | 0.59  |
|                               | Jer   | 43.53              | 21.30              | 26.14              | 30.32   | 2.913 |                      |       |
|                               | Total | 39.67 <sup>a</sup> | 19.57 <sup>c</sup> | 27.30 <sup>b</sup> | -       | 2.782 |                      |       |
| Proteobacteria                | Hol   | 3.19               | 10.03              | 8.81               | 7.34    | 2.541 | 0.07                 | <0.01 |
|                               | Jer   | 1.85               | 3.65               | 1.48               | 2.32    | 0.673 |                      |       |
|                               | Total | 2.52               | 6.84               | 5.14               | -       | 1.607 |                      |       |
| Tenericutes                   | Hol   | 1.26               | 0.82               | 0.48               | 0.86    | 0.206 | 0.04                 | 0.83  |
|                               | Jer   | 1.31               | 1.06               | 0.53               | 0.97    | 0.298 |                      |       |
|                               | Total | 1.29 <sup>a</sup>  | 0.94 <sup>ab</sup> | 0.51 <sup>b</sup>  | -       | 0.252 |                      |       |
| Spirochaetes                  | Hol   | 0.76               | 0.79               | 1.38               | 0.97    | 0.270 | 0.046                | 0.18  |
|                               | Jer   | 0.52               | 2.83               | 3.31               | 2.22    | 0.798 |                      |       |
|                               | Total | 0.64 <sup>b</sup>  | 1.81 <sup>ab</sup> | 2.34 <sup>a</sup>  | -       | 0.534 |                      |       |
| Candidatus<br>Melainabacteria | Hol   | 0.39               | 0.37               | 1.07               | 0.61    | 0.149 | 0.04                 | 0.95  |
|                               | Jer   | 0.62               | 0.37               | 0.48               | 0.49    | 0.096 |                      |       |
|                               | Total | 0.50 <sup>ab</sup> | 0.37 <sup>b</sup>  | 0.77 <sup>a</sup>  | -       | 0.122 |                      |       |
| Fibrobacteres                 | Hol   | 0.28               | 1.09               | 0.58               | 0.65    | 0.232 | <0.01                | 0.07  |
|                               | Jer   | 0.07               | 0.43               | 0.40               | 0.30    | 0.081 |                      |       |
|                               | Total | 0.17 <sup>b</sup>  | 0.76 <sup>a</sup>  | 0.49 <sup>ab</sup> | -       | 0.157 |                      |       |

SEM, standard error of the mean; Hol, Holstein steer; Jer, Jersey steer. <sup>a, b, c</sup> in the same row indicate the significant differences ( $p < 0.05$ ) of data among three different seasons regardless of breed.
