# Supplementary material for: Seasonal Influence on Rumen Microbiota, Rumen Fermentation, and Enteric Methane Emissions of Holstein and Jersey Steers under the Same Total Mixed Ration
Source: MDPI journal article supplement (doi:10.3390/ani11041184), 2021-04-20
Supplement: s1 [file s1]

**Table S3.** Major genera of bacteria had relative abundance  $\geq 1\%$  at least in one breed at one season.

| Phylum                        | Genera                  | Breed | Season              |                    |                    |         | SEM   | Mixed P value |       |
|-------------------------------|-------------------------|-------|---------------------|--------------------|--------------------|---------|-------|---------------|-------|
|                               |                         |       | Winter              | Spring             | Summer             | Overall |       | Season        | Breed |
| Bacteroidetes                 | <i>Prevotella</i>       | Hol   | 45.45               | 46.85              | 35.60              | 42.63   | 3.036 | 0.03          | 0.57  |
|                               |                         | Jer   | 33.92               | 47.11              | 37.34              | 39.45   | 3.666 |               |       |
|                               |                         | Total | 39.68 <sup>ab</sup> | 46.98 <sup>a</sup> | 36.47 <sup>b</sup> | -       | 3.351 |               |       |
|                               | <i>Paraprevotella</i>   | Hol   | 4.48                | 4.59               | 2.72               | 3.39    | 0.723 | 0.049         | 0.24  |
|                               |                         | Jer   | 4.19 <sup>a</sup>   | 3.89 <sup>a</sup>  | 2.24 <sup>b</sup>  | 3.44    | 0.889 |               |       |
|                               |                         | Total | 4.33                | 4.24               | 2.48               | -       | 0.806 |               |       |
|                               | <i>Paludibacter</i>     | Hol   | 1.82                | 4.07               | 8.66               | 4.85    | 1.409 | <0.01         | 0.57  |
|                               |                         | Jer   | 1.48                | 3.00               | 9.74               | 4.74    | 1.234 |               |       |
|                               |                         | Total | 1.65 <sup>b</sup>   | 3.54 <sup>b</sup>  | 9.20 <sup>a</sup>  | -       | 1.321 |               |       |
|                               | <i>Galbibacter</i>      | Hol   | 1.21                | 0.66               | 1.40               | 1.09    | 0.207 | 0.10          | 0.87  |
|                               |                         | Jer   | 1.10                | 0.98               | 1.32               | 1.13    | 0.260 |               |       |
|                               |                         | Total | 1.16                | 0.82               | 1.36               | -       | 0.233 |               |       |
|                               | <i>Bacteroides</i>      | Hol   | 1.08                | 2.67               | 0.81               | 1.52    | 0.268 | <0.01         | 0.22  |
|                               |                         | Jer   | 0.93                | 2.09               | 0.65               | 1.22    | 0.413 |               |       |
|                               |                         | Total | 1.00 <sup>b</sup>   | 2.38 <sup>a</sup>  | 0.73 <sup>b</sup>  | -       | 0.341 |               |       |
|                               | <i>Lentimicrobium</i>   | Hol   | 0.85                | 1.87               | 0.24               | 0.98    | 0.483 | 0.01          | 0.73  |
|                               |                         | Jer   | 0.79                | 0.40               | 0.33               | 0.51    | 0.090 |               |       |
|                               |                         | Total | 0.82 <sup>a</sup>   | 1.14 <sup>a</sup>  | 0.28 <sup>b</sup>  | -       | 0.287 |               |       |
|                               | <i>Capnocytophaga</i>   | Hol   | 0.63                | 0.43               | 3.55               | 1.53    | 0.460 | 0.02          | 0.03  |
|                               |                         | Jer   | 0.96                | 4.35               | 3.41               | 2.91    | 0.937 |               |       |
|                               |                         | Total | 0.80 <sup>b</sup>   | 2.39 <sup>ab</sup> | 3.48 <sup>a</sup>  | -       | 0.699 |               |       |
|                               | <i>Muribaculum</i>      | Hol   | 0.31                | 0.80               | 0.18               | 0.43    | 0.189 | 0.19          | 0.03  |
|                               |                         | Jer   | 0.66                | 0.70               | 1.04               | 0.80    | 0.344 |               |       |
|                               |                         | Total | 0.48                | 0.75               | 0.61               | -       | 0.267 |               |       |
|                               | <i>Barnesiella</i>      | Hol   | 0.27                | 1.41               | 0.50               | 0.73    | 0.267 | 0.54          | <0.01 |
|                               |                         | Jer   | 3.24                | 2.15               | 2.38               | 2.59    | 0.986 |               |       |
|                               |                         | Total | 1.75                | 1.78               | 1.44               | -       | 0.626 |               |       |
|                               | <i>Sphingobacterium</i> | Hol   | 0.14                | 0.11               | 1.22               | 0.49    | 0.315 | 0.01          | 0.95  |
|                               |                         | Jer   | 0.43                | 0.11               | 3.05               | 1.20    | 0.846 |               |       |
|                               |                         | Total | 0.29 <sup>b</sup>   | 0.11 <sup>b</sup>  | 2.14 <sup>a</sup>  | -       | 0.580 |               |       |
|                               | <i>Marseilla</i>        | Hol   | 0.14                | 2.20               | 1.03               | 1.12    | 0.499 | <0.01         | 0.15  |
|                               |                         | Jer   | 0.88                | 1.30               | 1.85               | 1.34    | 0.408 |               |       |
|                               |                         | Total | 0.51 <sup>b</sup>   | 1.75 <sup>a</sup>  | 1.44 <sup>ab</sup> | -       | 0.454 |               |       |
|                               | <i>Parabacteroides</i>  | Hol   | 0.07                | 0.39               | 1.04               | 0.50    | 0.172 | <0.01         | 0.43  |
|                               |                         | Jer   | 0.25                | 1.32               | 0.54               | 0.70    | 0.271 |               |       |
|                               |                         | Total | 0.16 <sup>b</sup>   | 0.86 <sup>a</sup>  | 0.79 <sup>a</sup>  | -       | 0.221 |               |       |
|                               | <i>Olivibacter</i>      | Hol   | 0.00                | 0.00               | 0.00               | 0.00    | 0.001 | 0.02          | 0.13  |
|                               |                         | Jer   | 0.00                | 0.73               | 1.83               | 0.85    | 0.693 |               |       |
|                               |                         | Total | 0.00 <sup>b</sup>   | 0.36 <sup>ab</sup> | 0.92 <sup>a</sup>  | -       | 0.347 |               |       |
| Candidatus<br>Melainabacteria | <i>Vampirovibrio</i>    | Hol   | 0.39                | 0.37               | 1.07               | 0.61    | 0.149 | 0.04          | 0.90  |
|                               |                         | Jer   | 0.59                | 0.37               | 0.48               | 0.48    | 0.100 |               |       |
|                               |                         | Total | 0.49 <sup>ab</sup>  | 0.37 <sup>b</sup>  | 0.77 <sup>a</sup>  | -       | 0.124 |               |       |
| Fibrobacteres                 | <i>Fibrobacter</i>      | Hol   | 0.28                | 1.09               | 0.58               | 0.65    | 0.232 | <0.01         | 0.08  |
|                               |                         | Jer   | 0.08                | 0.43               | 0.40               | 0.30    | 0.084 |               |       |
|                               |                         | Total | 0.18 <sup>b</sup>   | 0.76 <sup>a</sup>  | 0.49 <sup>ab</sup> | -       | 0.158 |               |       |
| Firmicutes                    | <i>Carnobacterium</i>   | Hol   | 11.83               | 0.00               | 0.00               | 3.94    | 0.554 | <0.01         | 0.47  |

|                            |                      |       |                   |                    |                    |      |       |       |       |
|----------------------------|----------------------|-------|-------------------|--------------------|--------------------|------|-------|-------|-------|
|                            |                      | Jer   | 7.94 <sup>a</sup> | 0.00 <sup>b</sup>  | 0.00 <sup>b</sup>  | 2.65 | 1.219 |       |       |
|                            |                      | Total | 9.89              | 0.00               | 0.00               | -    | 0.887 |       |       |
| <i>Ruminococcus</i>        |                      | Hol   | 5.61              | 2.37               | 3.68               | 3.89 | 0.855 |       |       |
|                            |                      | Jer   | 9.33              | 2.07               | 3.06               | 4.82 | 1.093 | <0.01 | 0.83  |
|                            |                      | Total | 7.47 <sup>a</sup> | 2.22 <sup>b</sup>  | 3.37 <sup>b</sup>  | -    | 0.974 |       |       |
|                            |                      |       |                   |                    |                    |      |       |       |       |
| <i>Intestinimonas</i>      |                      | Hol   | 2.43              | 0.55               | 1.27               | 1.42 | 0.250 |       |       |
|                            |                      | Jer   | 2.91              | 0.69               | 1.89               | 1.83 | 0.328 | <0.01 | 0.30  |
|                            |                      | Total | 2.67 <sup>a</sup> | 0.62 <sup>c</sup>  | 1.58 <sup>b</sup>  | -    | 0.289 |       |       |
|                            |                      |       |                   |                    |                    |      |       |       |       |
| <i>Succiniclasticum</i>    |                      | Hol   | 1.30              | 2.80               | 5.83               | 3.31 | 1.036 |       |       |
|                            |                      | Jer   | 1.30              | 2.70               | 2.50               | 2.17 | 0.643 | 0.01  | 0.51  |
|                            |                      | Total | 1.30 <sup>b</sup> | 2.75 <sup>ab</sup> | 4.17 <sup>a</sup>  | -    | 0.839 |       |       |
|                            |                      |       |                   |                    |                    |      |       |       |       |
| <i>Ethanoligenens</i>      |                      | Hol   | 1.12              | 1.31               | 0.61               | 1.01 | 0.193 |       |       |
|                            |                      | Jer   | 2.37              | 1.43               | 1.01               | 1.60 | 0.672 | 0.03  | 0.41  |
|                            |                      | Total | 1.74 <sup>a</sup> | 1.37 <sup>a</sup>  | 0.81 <sup>b</sup>  | -    | 0.432 |       |       |
|                            |                      |       |                   |                    |                    |      |       |       |       |
| <i>Lactobacillus</i>       |                      | Hol   | 1.07              | 0.18               | 0.25               | 0.50 | 0.230 |       |       |
|                            |                      | Jer   | 0.18              | 0.16               | 0.08               | 0.14 | 0.059 | 0.55  | 0.05  |
|                            |                      | Total | 0.63              | 0.17               | 0.17               | -    | 0.144 |       |       |
|                            |                      |       |                   |                    |                    |      |       |       |       |
| <i>Flintibacter</i>        |                      | Hol   | 0.95              | 0.61               | 1.46               | 1.01 | 0.179 |       |       |
|                            |                      | Jer   | 2.33              | 1.10               | 1.98               | 1.80 | 0.341 | 0.01  | 0.01  |
|                            |                      | Total | 1.64 <sup>a</sup> | 0.86 <sup>b</sup>  | 1.72 <sup>a</sup>  | -    | 0.260 |       |       |
|                            |                      |       |                   |                    |                    |      |       |       |       |
| <i>Christensenella</i>     |                      | Hol   | 0.84              | 0.52               | 0.61               | 0.66 | 0.134 |       |       |
|                            |                      | Jer   | 1.69              | 0.49               | 0.96               | 1.04 | 0.249 | 0.01  | 0.16  |
|                            |                      | Total | 1.26 <sup>a</sup> | 0.50 <sup>b</sup>  | 0.78 <sup>ab</sup> | -    | 0.191 |       |       |
|                            |                      |       |                   |                    |                    |      |       |       |       |
| <i>UCG_Ruminococcaceae</i> |                      | Hol   | 0.84              | 0.51               | 0.61               | 0.65 | 0.101 |       |       |
|                            |                      | Jer   | 2.37              | 0.60               | 1.16               | 1.38 | 0.378 | 0.01  | 0.03  |
|                            |                      | Total | 1.60 <sup>a</sup> | 0.55 <sup>b</sup>  | 0.88 <sup>ab</sup> | -    | 0.239 |       |       |
|                            |                      |       |                   |                    |                    |      |       |       |       |
| <i>Anaerobacterium</i>     |                      | Hol   | 0.63              | 0.67               | 1.87               | 1.06 | 0.240 |       |       |
|                            |                      | Jer   | 0.64              | 0.78               | 1.45               | 0.96 | 0.253 | 0.01  | 0.80  |
|                            |                      | Total | 0.64 <sup>b</sup> | 0.73 <sup>b</sup>  | 1.66 <sup>a</sup>  | -    | 0.246 |       |       |
|                            |                      |       |                   |                    |                    |      |       |       |       |
| <i>Enterocloster</i>       |                      | Hol   | 0.30              | 0.58               | 0.80               | 0.56 | 0.097 |       |       |
|                            |                      | Jer   | 0.45              | 1.53               | 0.93               | 0.97 | 0.139 | <0.01 | 0.02  |
|                            |                      | Total | 0.37 <sup>b</sup> | 1.06 <sup>a</sup>  | 0.87 <sup>a</sup>  | -    | 0.118 |       |       |
|                            |                      |       |                   |                    |                    |      |       |       |       |
| <i>Vallitalea</i>          |                      | Hol   | 0.20              | 0.62               | 1.47               | 0.76 | 0.142 |       |       |
|                            |                      | Jer   | 0.34              | 0.53               | 1.04               | 0.63 | 0.144 | <0.01 | 0.75  |
|                            |                      | Total | 0.27 <sup>b</sup> | 0.57 <sup>b</sup>  | 1.26 <sup>a</sup>  | -    | 0.143 |       |       |
|                            |                      |       |                   |                    |                    |      |       |       |       |
| <i>Oscillibacter</i>       |                      | Hol   | 0.17              | 0.19               | 0.76               | 0.37 | 0.093 |       |       |
|                            |                      | Jer   | 0.75              | 1.11               | 1.08               | 0.98 | 0.317 | 0.01  | <0.01 |
|                            |                      | Total | 0.46 <sup>b</sup> | 0.65 <sup>ab</sup> | 0.92 <sup>a</sup>  | -    | 0.205 |       |       |
|                            |                      |       |                   |                    |                    |      |       |       |       |
| Proteobacteria             |                      | Hol   | 2.21              | 0.00               | 0.00               | 0.74 | 0.614 |       |       |
|                            | <i>Pseudomonas</i>   | Jer   | 0.18              | 0.00               | 0.00               | 0.06 | 0.046 | <0.01 | 0.36  |
|                            |                      | Total | 1.19 <sup>a</sup> | 0.00 <sup>b</sup>  | 0.00 <sup>b</sup>  | -    | 0.330 |       |       |
|                            |                      |       |                   |                    |                    |      |       |       |       |
|                            |                      | Hol   | 0.36              | 2.87               | 0.86               | 1.36 | 0.257 |       |       |
|                            | <i>Succinivibrio</i> | Jer   | 0.23              | 0.98               | 0.67               | 0.62 | 0.389 | 0.01  | 0.01  |
|                            |                      | Total | 0.29 <sup>b</sup> | 1.92 <sup>a</sup>  | 0.77 <sup>b</sup>  | -    | 0.323 |       |       |
|                            |                      |       |                   |                    |                    |      |       |       |       |
|                            |                      | Hol   | 0.29              | 5.93               | 7.41               | 4.54 | 1.772 |       |       |
|                            | <i>Gilliamella</i>   | Jer   | 0.23              | 2.07               | 0.57               | 0.96 | 0.451 | <0.01 | 0.02  |
|                            |                      | Total | 0.26 <sup>b</sup> | 4.00 <sup>a</sup>  | 3.99 <sup>a</sup>  | -    | 1.112 |       |       |
|                            |                      |       |                   |                    |                    |      |       |       |       |
| Spirochaetes               | <i>Treponema</i>     | Hol   | 0.75              | 0.75               | 1.36               | 0.95 | 0.270 |       |       |
|                            |                      | Jer   | 0.47              | 2.76               | 3.27               | 2.17 | 0.795 | 0.05  | 0.22  |
|                            |                      | Total | 0.61 <sup>b</sup> | 1.76 <sup>ab</sup> | 2.31 <sup>a</sup>  | -    | 0.532 |       |       |
| Tenericutes                | <i>Anaeroplasma</i>  | Hol   | 0.83              | 0.45               | 0.38               | 0.55 | 0.136 | 0.17  | 0.73  |

|       |      |      |      |      |       |
|-------|------|------|------|------|-------|
| Jer   | 1.04 | 0.46 | 0.42 | 0.64 | 0.249 |
| Total | 0.93 | 0.45 | 0.40 | -    | 0.192 |

---

SEM, standard error of the mean; Hol, Holstein steer; Jer, Jersey steer. <sup>a, b, c</sup> in the same row indicate the significant differences ( $p < 0.05$ ) of data among three different seasons regardless of breed.
