# Supplementary material for: Seasonal Influence on Rumen Microbiota, Rumen Fermentation, and Enteric Methane Emissions of Holstein and Jersey Steers under the Same Total Mixed Ration
Source: MDPI journal article supplement (doi:10.3390/ani11041184), 2021-04-20
Supplement: s1 [file s1]

**Table S1.** Richness and diversity of rumen microbiome of Holstein and Jersey steers at different seasons.

| Parameters      | Breed | Season              |                      |                     |         | SEM    | Mixed <i>p</i> value |       |
|-----------------|-------|---------------------|----------------------|---------------------|---------|--------|----------------------|-------|
|                 |       | Winter              | Spring               | Summer              | Overall |        | Season               | Breed |
| OTUs            | Hol   | 741.92              | 912.58               | 618.25              | 757.58  | 46.443 | <0.01                | 0.40  |
|                 | Jer   | 743.33              | 975.67               | 663.42              | 797.03  | 51.422 |                      |       |
|                 | Total | 746.96 <sup>b</sup> | 944.13 <sup>a</sup>  | 640.83 <sup>b</sup> | -       | 48.649 |                      |       |
| Chao1           | Hol   | 854.09              | 1064.00              | 798.35              | 905.48  | 52.821 | <0.01                | 0.55  |
|                 | Jer   | 849.84              | 1135.61              | 834.77              | 944.19  | 54.175 |                      |       |
|                 | Total | 858.15 <sup>b</sup> | 1099.81 <sup>a</sup> | 816.56 <sup>b</sup> | -       | 53.106 |                      |       |
| Shannon         | Hol   | 5.63                | 6.46                 | 6.77                | 6.29    | 0.198  | 0.01                 | 0.85  |
|                 | Jer   | 5.76                | 6.21                 | 6.63                | 6.23    | 0.314  |                      |       |
|                 | Total | 5.74 <sup>b</sup>   | 6.33 <sup>a</sup>    | 6.70 <sup>a</sup>   | -       | 0.261  |                      |       |
| Inverse Simpson | Hol   | 0.92                | 0.96                 | 0.96                | 0.95    | 0.010  | 0.02                 | 0.68  |
|                 | Jer   | 0.91                | 0.93                 | 0.96                | 0.93    | 0.020  |                      |       |
|                 | Total | 0.92 <sup>b</sup>   | 0.94 <sup>ab</sup>   | 0.96 <sup>a</sup>   | -       | 0.015  |                      |       |

OTUs, operational taxonomic units; SEM, standard error of the mean; Hol, Holstein steer; Jer, Jersey steer. <sup>a, b, c</sup> in the same row indicate the significant differences ( $p < 0.05$ ) of data among three different seasons regardless of breed.
